# Supplementary material
Source: publisher site journal article supplement (https://www.dovepress.com/article/438714)
Supplement: Supplementary file 1 [file get_supplementary_file.php]

**Supplementary Tables and Figures**

**Supplementary Tables**

**Supplementary Table S1.** Interval likelihood ratios for the prediction of weaning failure using lung ultrasound score measured during the RR and RSBI

|  | Weaning failure  (n=13) | Weaning success  (n=22) | Likelihood  Ratio | 95%CI |
| --- | --- | --- | --- | --- |
| RR |  |  |  |  |
| ≤ 18 | 1 | 4 | 0.4 | 0.23-0.59 |
| 18-25 | 4 | 16 | 0.4 | 0.17-0.67 |
| ≥ 25 | 8 | 2 | 6.8 | 1.69-27.16 |
| RSBI |  |  |  |  |
| < 50 | 1 | 8 | 0.2 | 0.03-1.51 |
| 50-67 | 5 | 12 | 0.7 | 0.32-1.55 |
| ≥ 67 | 7 | 2 | 5.9 | 1.44-24.35 |

*RR* respiratory rate, *RSBI* rapid shallow breathing index.

**Supplementary Figures**

**
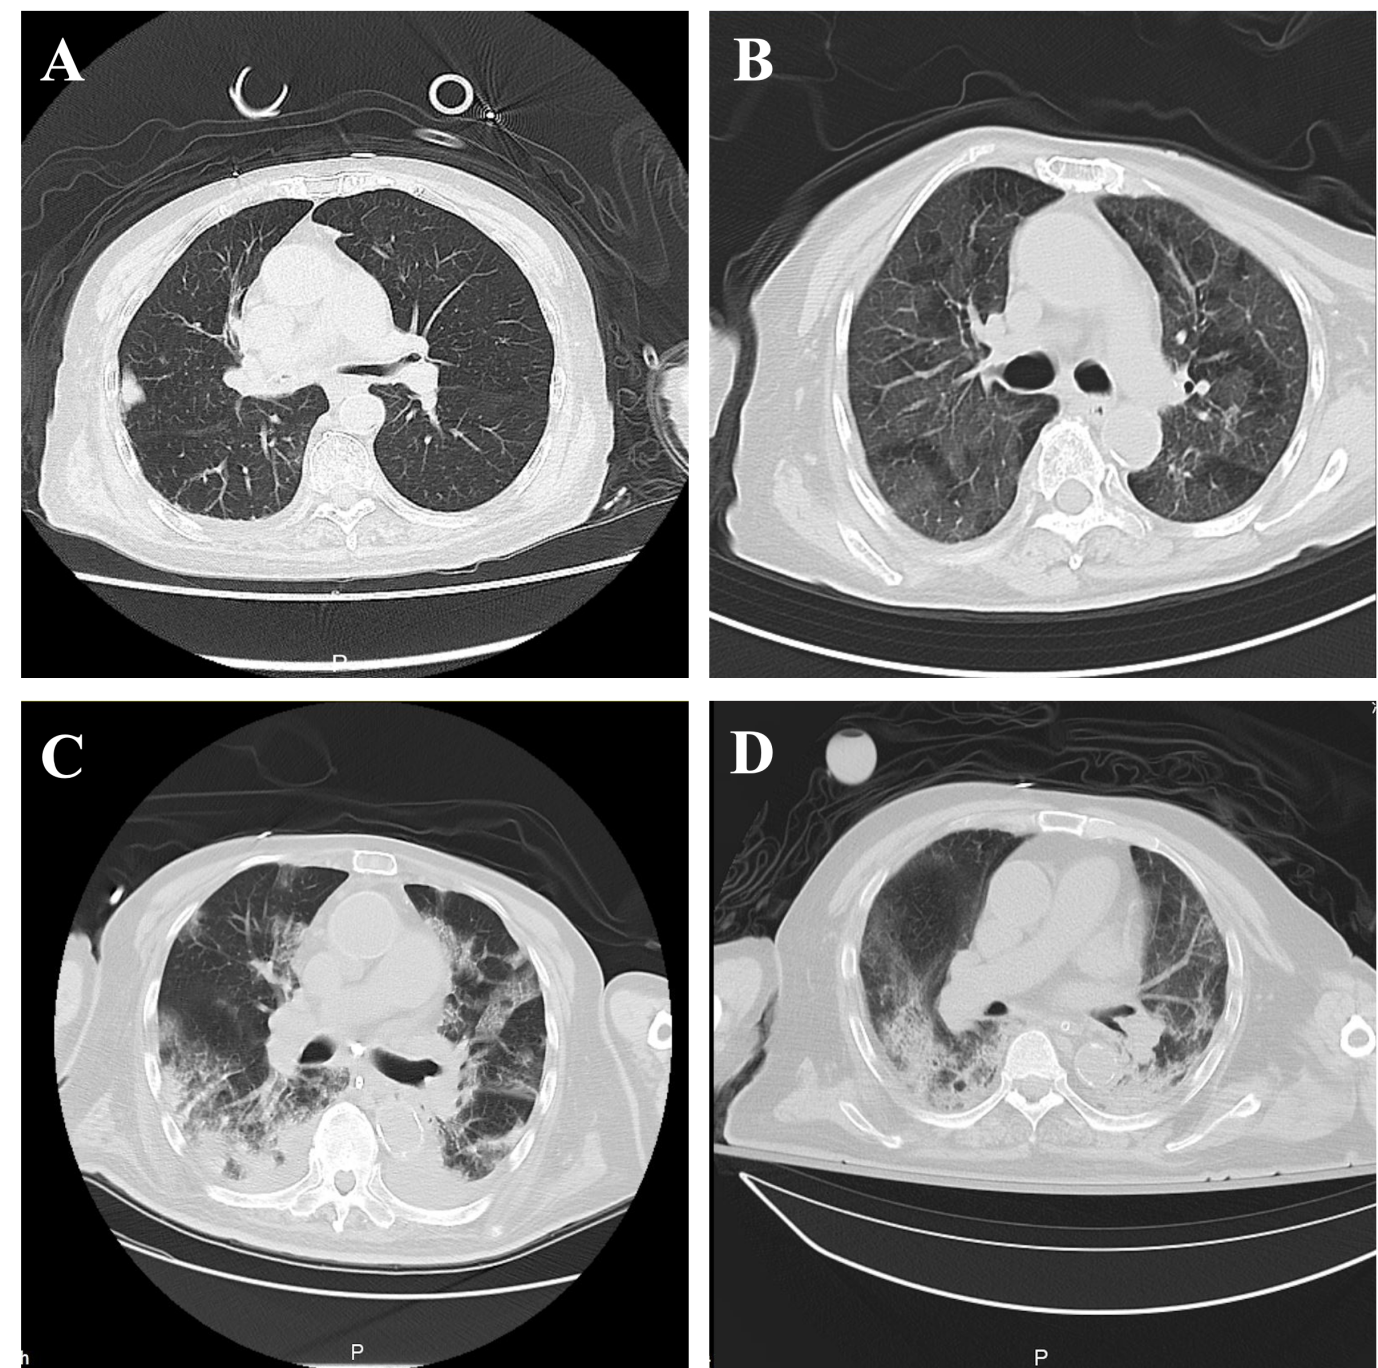
**

**Supplementary Figure S1**. Chest computed tomographic features of patients with COVID-19. (A) Isolated ground glass opacity below the pleura of the right lung; (B) Extensive ground glass opacities in both lungs; (C) Multiple patchy opacities present in both lungs, local changes like paving stones, a small amount of pleural effusion on both sides; (D) Extensive consolidation and ground-glass opacities in both lungs, with accompanying reticular changes.


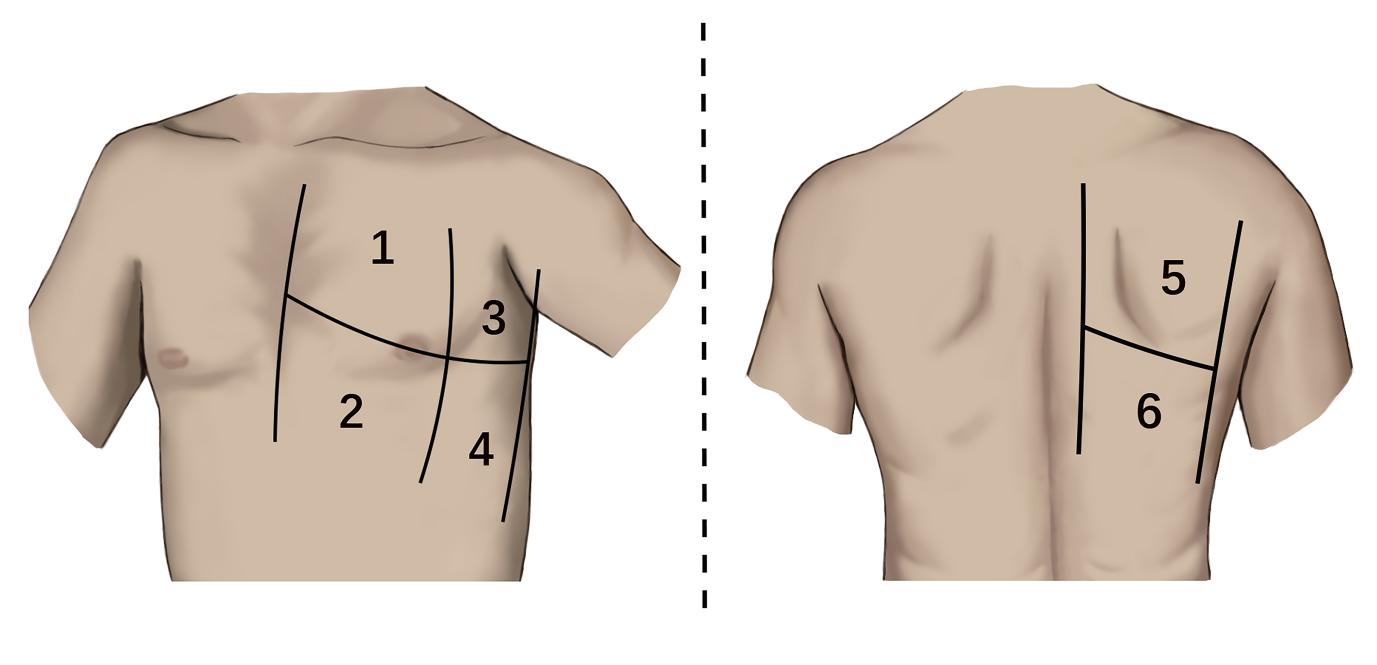


**Supplementary Figure S2.** The six regions into which the lungs were divided in order to calculate the 12-region lung ultrasound score.


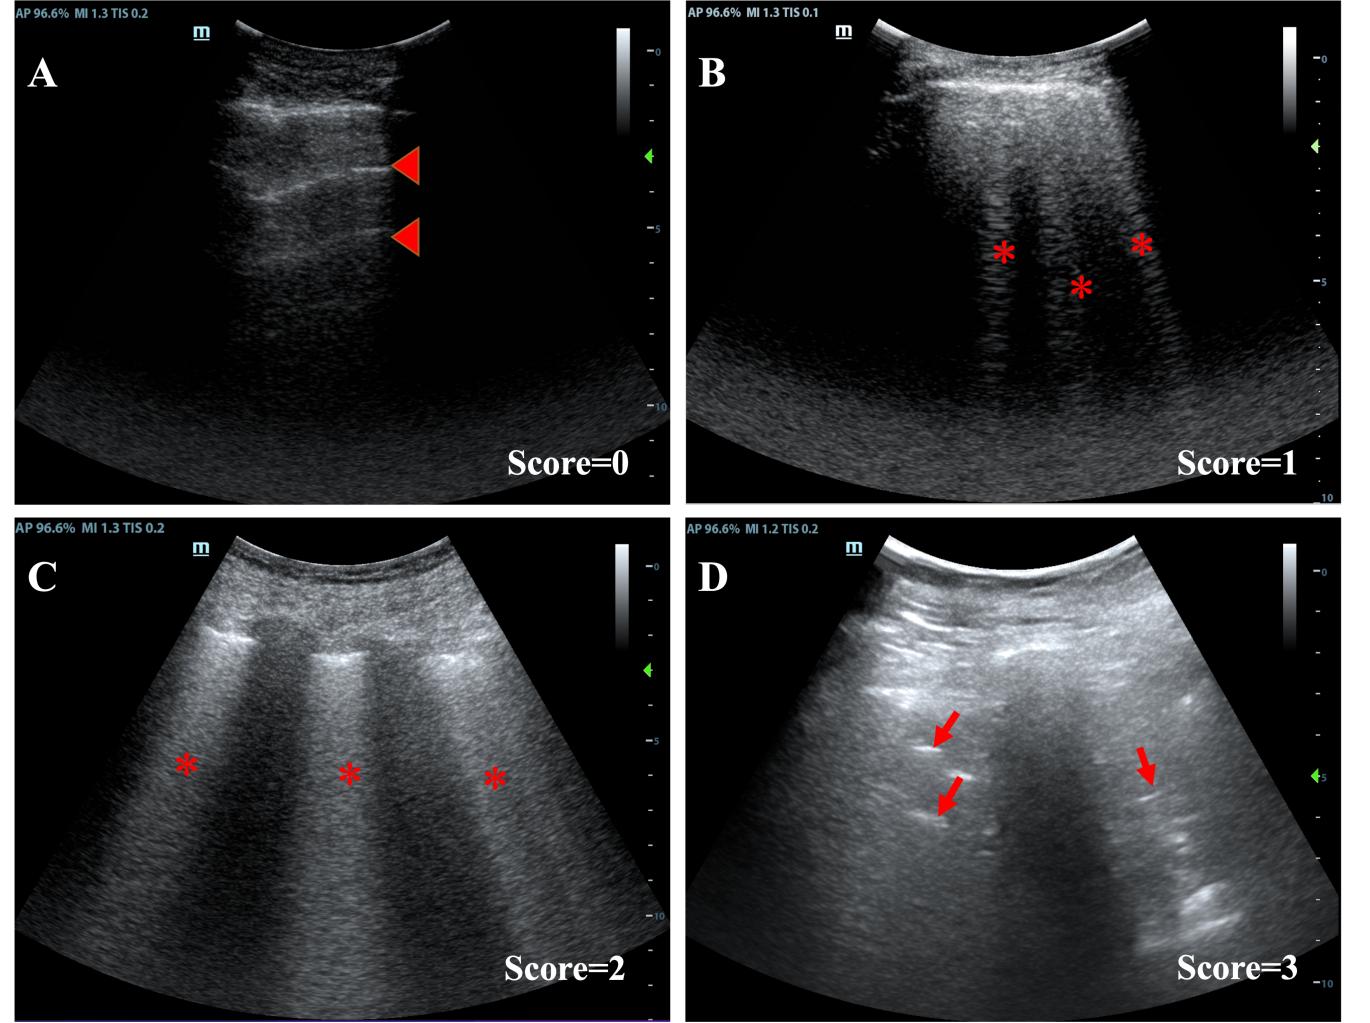


**Supplementary Figure S3.** Representative examples of patients showing different extents of aeration loss. Lung ultrasound scores are shown at the lower right of each image. (A) A patient scoring 0. Red triangles indicate horizontal reverberation artifacts (A lines). (B) A patient scoring 1. Asterisks indicate multiple well-defined B lines. (C) A patient scoring 2. Asterisks indicate coalescent B lines. (D) A patient scoring 3. Red arrows indicate air bronchograms.


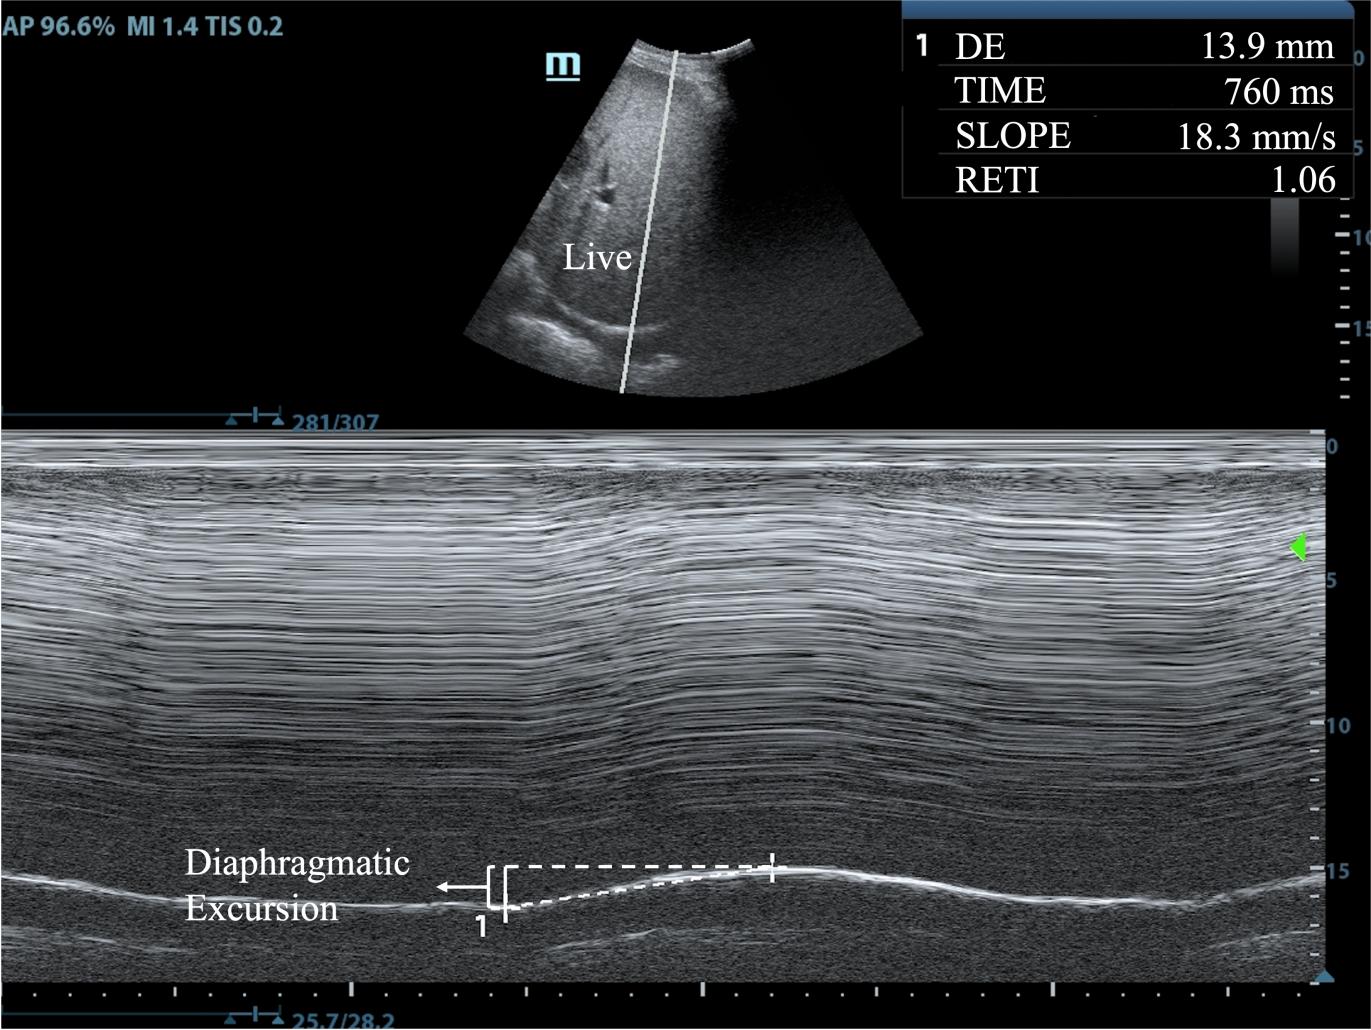


**Supplementary Figure S4.** An M-mode ultrasound image illustrating how right diaphragmatic excursion was measured in this study. In this patient, the excursion was found to be 13.9 mm.


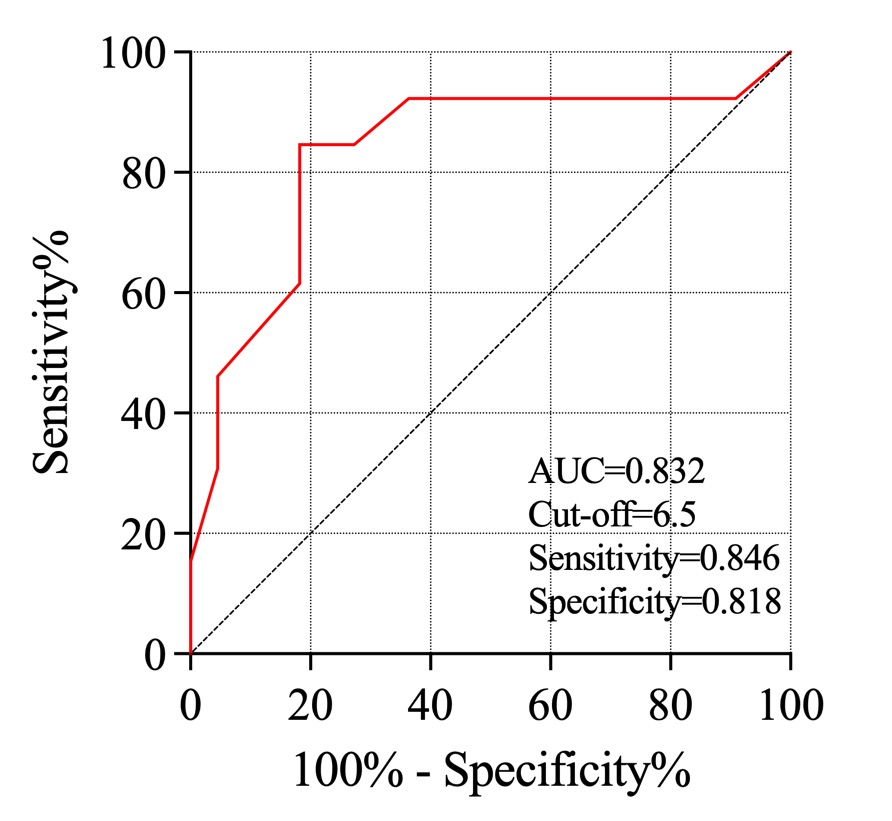


**Supplementary Figure S5.** Receiver operating characteristic curve to assess the ability of an 8-region lung ultrasound score to predict weaning failure.


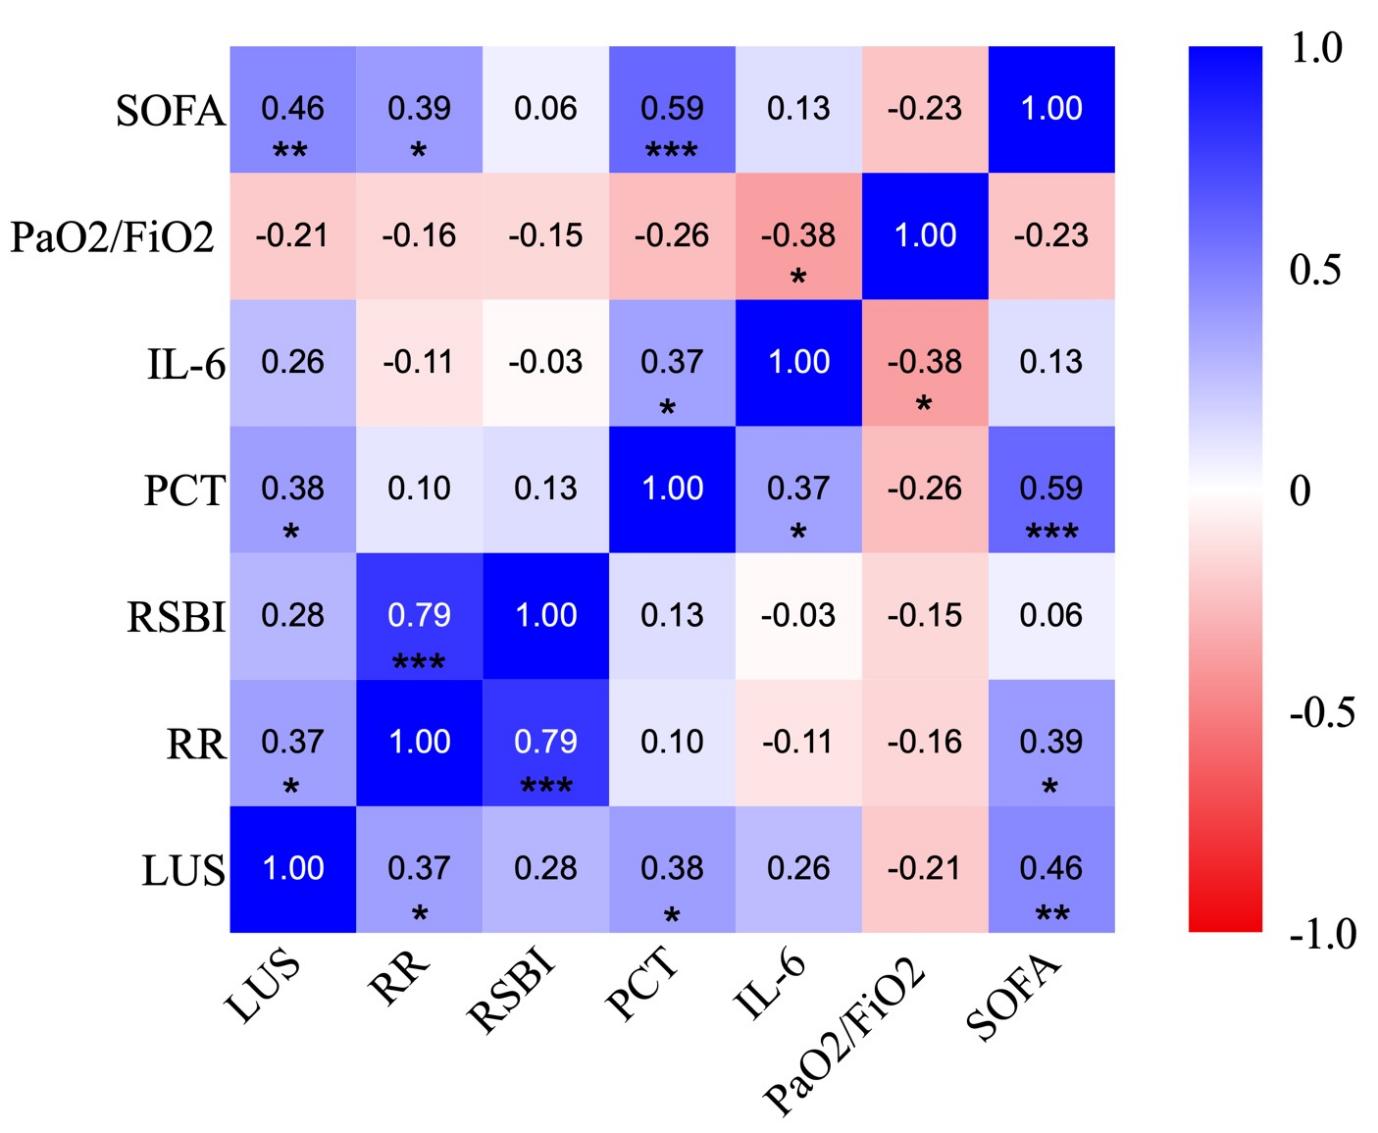


**Supplementary Figure S6.** Heat map of pairwise Spearman rank correlations between the indicated variables. **p* < 0.05, ***p* < 0.01, ****p* < 0.001. IL, interleukin; FiO2, fraction of inspired oxygen; LUS, lung ultrasound score; PaO2, partial pressure of oxygen; PCT, Procalcitonin; RR, respiratory rate; SOFA, sequential organ failure assessment score.
